# Supplementary material
Source: Springer Nature journal article supplement (https://www.springermedizin.de/resource/supplementary/12879_2009_1153_MOESM3_ESM.pdf/9441970)

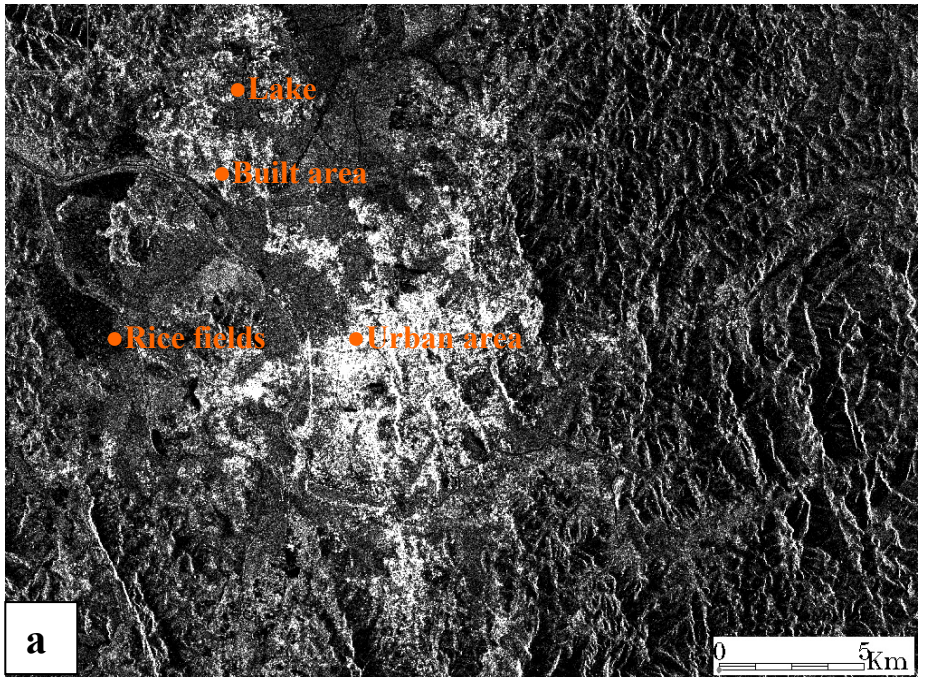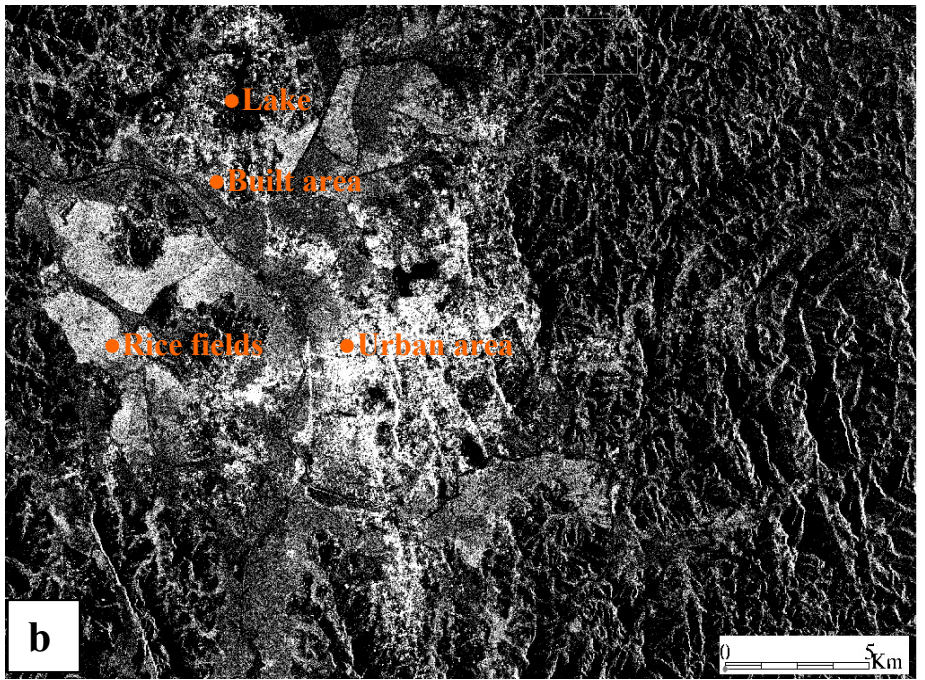

Supplement: MOESM3 [file 9441970]
